# Supplementary material for: The Genomics and Metagenomics of Asthma Severity (GEMAS) Study: Rationale and Design
Source: PubMed Central journal article supplement (PMC7563269; doi:10.3390/jpm10030123), 2020-09-11
Supplement: jpm-10-00123-s001.pdf [file jpm-10-00123-s001.pdf]

## Supplementary Material. The Genomics and Metagenomics of Asthma Severity (GEMAS) study: rationale and design

**Table S1.** Description of patients with asthma recruited in the Canary Islands.

|                                            | Sample size (n) | All patients           |                        |                 | Allergy units           |                        |                 | Pulmonary medicine units |                        |                 |
|--------------------------------------------|-----------------|------------------------|------------------------|-----------------|-------------------------|------------------------|-----------------|--------------------------|------------------------|-----------------|
|                                            |                 | Controls (n=102)       | Cases (n=103)          | <i>p</i> -value | Controls (n=31)         | Cases (n=43)           | <i>p</i> -value | Controls (n=71)          | Cases (n=60)           | <i>p</i> -value |
| Age (years)                                | 205             | 50.5 (33.0-62.0)       | 46.0 (29.5-59.5)       | 0.253           | 33.0 (21.5-45.0)        | 33.0 (20.5-49.0)       | 0.832           | 55.0 (44.0-66.0)         | 51.5 (37.8-64.5)       | 0.492           |
| Gender (female)                            | 205             | 65 (63.7)              | 71 (68.9)              | 0.462           | 20 (64.5)               | 29 (67.4)              | 0.808           | 45 (63.4)                | 42 (70.0)              | 0.462           |
| Ever smoker                                | 202             | 29 (28.7)              | 38 (37.6)              | 0.232           | 4 (13.3)                | 13 (31.7)              | 0.095           | 25 (35.2)                | 25 (41.7)              | 0.475           |
| Lung function                              |                 |                        |                        |                 |                         |                        |                 |                          |                        |                 |
| pre-FEV <sub>1</sub> (% predicted)         | 197             | 90.3 (76.1-101.9)      | 83.4 (69.2-92.6)       | <b>0.003</b>    | 88.5 (72.9-95.2)        | 79.4 (68.4-90.7)       | 0.153           | 92.3 (79.6-102.3)        | 85.7 (71.3-93.2)       | <b>0.017</b>    |
| pre-FEV <sub>1</sub> (z-score)             | 197             | -0.8 (1.3)             | -1.3 (1.3)             | <b>0.006</b>    | -1.2 (1.5)              | -1.5 (1.4)             | 0.316           | -0.7 (1.1)               | -1.2 (1.2)             | <b>0.014</b>    |
| pre-FVC (% predicted)                      | 196             | 94.2 (81.3-102.6)      | 87.7 (79.3-96.5)       | <b>0.020</b>    | 95.2 (82.3-101.0)       | 89.4 (79.9-96.1)       | 0.159           | 93.6 (80.8-103.6)        | 86.3 (78.7-97.0)       | 0.052           |
| pre-FVC (Z-score)                          | 196             | -0.5 (1.1)             | -0.9 (1.1)             | <b>0.012</b>    | -0.5 (1.0)              | -0.9 (1.1)             | 0.125           | -0.6 (1.1)               | -0.9 (1.0)             | <b>0.045</b>    |
| pre-FEV <sub>1</sub> /FVC (%)              | 196             | 79.1 (72.4-83.5)       | 75.9 (68.3-83.2)       | 0.138           | 78.1 (70.0-81.8)        | 73.4 (67.8-83.2)       | 0.590           | 79.5 (72.5-83.6)         | 76.8 (71.1-83.2)       | 0.238           |
| BDR (%)                                    | 72              | 4.7 (1.8-10.5)         | 9.0 (3.1-15.0)         | 0.166           | 5.7 (2.8-13.4)          | 10.8 (3.7-17.8)        | 0.295           | 2.1 (-0.1-6.1)           | 5.1 (1.5-13.0)         | 0.234           |
| Total IgE levels (UI/ml)                   | 187             | 149.8<br>(42.1-434.5)  | 125.7<br>(39.3-449.3)  | 0.641           | 607.5<br>(210.3-1316.3) | 212.0<br>(76.6-1223.0) | 0.141           | 91.8<br>(27.2-210.4)     | 101.5<br>(24.1-220.4)  | 0.949           |
| Absolute eosinophil count (cells/ $\mu$ l) | 192             | 300.0<br>(200.0-500.0) | 300.0<br>(100.0-500.0) | 0.209           | 340.0<br>(255.0-695.0)  | 430.0<br>(165.0-545.0) | 0.616           | 300.0<br>(200.0-400.0)   | 200.0<br>(100.0-400.0) | 0.073           |
| Eosinophil percentage (%)                  | 186             | 4.3 (2.6-6.8)          | 3.7 (1.5-7.0)          | 0.190           | 7.0 (3.5-10.1)          | 5.4 (3.0-8.1)          | 0.134           | 3.8 (2.2-5.6)            | 2.6 (1.4-5.5)          | 0.151           |
| Comorbidities                              |                 |                        |                        |                 |                         |                        |                 |                          |                        |                 |
| Otorhinolaryngology disease                | 202             | 24 (23.8)              | 29 (28.7)              | 0.523           | 10 (33.3)               | 13 (31.7)              | 1.000           | 14 (19.7)                | 16 (26.7)              | 0.406           |
| Gastroesophageal reflux                    | 203             | 16 (15.7)              | 33 (32.7)              | <b>0.005</b>    | 9 (29.0)                | 24 (57.1)              | <b>0.020</b>    | 7 (9.9)                  | 9 (15.2)               | 0.426           |
| Sleep apnea                                | 202             | 15 (15.0)              | 12 (11.8)              | 0.540           | 5 (16.7)                | 4 (9.3)                | 0.473           | 10 (14.3)                | 8 (13.6)               | 1.000           |
| Obesity                                    | 197             | 37 (36.6)              | 33 (34.4)              | 0.768           | 9 (29.0)                | 12 (29.3)              | 0.796           | 28 (40.0)                | 21 (38.2)              | 0.856           |
| Atopy                                      | 179             | 69 (76.7)              | 70 (78.7)              | 0.858           | 27 (87.1)               | 39 (90.7)              | 0.713           | 42 (71.2)                | 31 (67.4)              | 0.676           |
| Other allergic phenotypes                  |                 |                        |                        |                 |                         |                        |                 |                          |                        |                 |
| Rhinitis                                   | 202             | 72 (70.6)              | 74 (74.0)              | 0.639           | 28 (90.3)               | 37 (86.0)              | 0.726           | 44 (62.0)                | 37 (64.9)              | 0.853           |
| Dermatitis                                 | 202             | 65 (63.7)              | 67 (67.0)              | 0.659           | 28 (90.3)               | 36 (83.7)              | 0.505           | 37 (52.1)                | 31 (54.4)              | 0.859           |
| Drug allergy                               | 202             | 18 (17.6)              | 20 (20.0)              | 0.721           | 11 (35.5)               | 14 (32.6)              | 0.808           | 7 (9.9)                  | 6 (10.5)               | 1.000           |
| Food allergy                               | 202             | 17 (16.7)              | 22 (22.0)              | 0.376           | 3 (9.7)                 | 6 (14.0)               | 0.726           | 14 (19.7)                | 16 (28.1)              | 0.299           |
| Food allergy                               | 202             | 7 (6.9)                | 12 (12.0)              | 0.236           | 4 (12.9)                | 6 (14.0)               | 1.000           | 3 (4.2)                  | 6 (10.5)               | 0.186           |
| Age of asthma onset (years)                | 188             | 16.0 (5.0-40.0)        | 20.0 (6.0-44.8)        | 0.572           | 13.0 (5.0-24.0)         | 15.0 (6.0-28.8)        | 0.257           | 22.5 (12.0-44.5)         | 30.0 (6.8-50.0)        | 0.756           |
| Family history                             |                 |                        |                        |                 |                         |                        |                 |                          |                        |                 |
| Allergy                                    | 205             | 70 (68.6)              | 71 (68.9)              | 1.000           | 28 (90.3)               | 32 (74.4)              | 0.132           | 42 (59.2)                | 39 (65.0)              | 0.589           |
| Asthma                                     | 205             | 44 (43.1)              | 46 (44.7)              | 0.888           | 17 (54.8)               | 20 (46.5)              | 0.639           | 27 (38.0)                | 26 (43.3)              | 0.594           |

|                            |     |                  |                  |                             |                  |                  |                            |                  |                  |                            |
|----------------------------|-----|------------------|------------------|-----------------------------|------------------|------------------|----------------------------|------------------|------------------|----------------------------|
| Asthma exacerbations       | 205 |                  |                  |                             |                  |                  |                            |                  |                  |                            |
| OCS use                    | 205 | 0 (0)            | 70 (68.0)        | NA                          | 0 (0)            | 31 (72.1)        | NA                         | 0 (0)            | 39 (65.0)        | NA                         |
| ER visits                  | 205 | 0 (0)            | 93 (90.3)        | NA                          | 0 (0)            | 37 (86.0)        | NA                         | 0 (0)            | 56 (93.3)        | NA                         |
| Hospitalizations           | 205 | 0 (0)            | 20 (19.4)        | NA                          | 0 (0)            | 8 (18.6)         | NA                         | 0 (0)            | 12 (20.0)        | NA                         |
| Asthma severity            | 200 |                  |                  |                             |                  |                  |                            |                  |                  |                            |
| Mild                       |     | 8 (7.9)          | 0 (0)            | <b>0.007</b>                | 6 (19.4)         | 0 (0)            | <b>0.005</b>               | 2 (2.8)          | 0 (0)            | 0.500                      |
| Moderate                   |     | 9 (8.9)          | 4 (4.0)          | 0.251                       | 3 (9.7)          | 4 (9.3)          | 1.000                      | 6 (8.5)          | 0 (0)            | <b>0.032</b>               |
| Severe                     |     | 84 (83.2)        | 95 (96.0)        | <b>0.005</b>                | 21 (67.7)        | 36 (83.7)        | 0.060                      | 63 (88.7)        | 59 (100)         | <b>0.008</b>               |
| Asthma control             | 191 |                  |                  |                             |                  |                  |                            |                  |                  |                            |
| Well controlled            |     | 55 (56.1)        | 26 (28.0)        | <b>1.3x10<sup>-4</sup></b>  | 9 (31.0)         | 3 (7.7)          | <b>0.022</b>               | 46 (66.7)        | 23 (42.6)        | <b>0.010</b>               |
| Partially controlled       |     | 29 (29.6)        | 27 (29.0)        | 1.000                       | 11 (37.9)        | 12 (30.8)        | 0.609                      | 18 (26.1)        | 15 (27.8)        | 0.841                      |
| Poorly controlled          |     | 14 (14.3)        | 40 (43.0)        | <b>1.2x10<sup>-5</sup></b>  | 9 (31.0)         | 24 (61.5)        | <b>0.016</b>               | 5 (7.2)          | 16 (29.6)        | <b>0.001</b>               |
| Pharmacological treatment  |     |                  |                  |                             |                  |                  |                            |                  |                  |                            |
| SABA                       | 205 | 47 (46.1)        | 79 (77.5)        | <b>6.5x10<sup>-6</sup></b>  | 19 (61.3)        | 34 (79.1)        | 0.120                      | 28 (39.4)        | 45 (76.3)        | <b>3.7x10<sup>-5</sup></b> |
| ICS                        | 205 | 95 (93.1)        | 103 (100)        | <b>0.007</b>                | 26 (83.9)        | 43 (100)         | <b>0.011</b>               | 69 (97.2)        | 60 (100)         | 0.500                      |
| LABA                       | 205 | 90 (88.2)        | 101 (98.1)       | <b>0.006</b>                | 25 (80.6)        | 42 (97.7)        | <b>0.019</b>               | 65 (91.6)        | 59 (98.3)        | 0.124                      |
| LTRA                       | 205 | 50 (49.0)        | 63 (61.8)        | 0.091                       | 11 (35.5)        | 21 (48.8)        | 0.342                      | 39 (54.9)        | 42 (71.2)        | 0.070                      |
| OCS                        | 204 | 7 (6.9)          | 51 (50.5)        | <b>1.3x10<sup>-12</sup></b> | 2 (6.5)          | 23 (53.5)        | <b>1.6x10<sup>-5</sup></b> | 5 (7.0)          | 28 (48.3)        | <b>1.1x10<sup>-7</sup></b> |
| SAMA                       | 205 | 19 (18.6)        | 42 (41.2)        | <b>7.0x10<sup>-4</sup></b>  | 0 (0)            | 5 (11.6)         | 0.070                      | 19 (26.8)        | 37 (62.7)        | <b>4.4x10<sup>-5</sup></b> |
| LAMA                       | 205 | 25 (24.5)        | 31 (30.4)        | 0.433                       | 2 (6.5)          | 6 (14.0)         | 0.455                      | 23 (32.4)        | 25 (42.4)        | 0.276                      |
| Theophylline               | 205 | 0 (0)            | 9 (8.8)          | <b>0.003</b>                | 0 (0)            | 1 (2.3)          | 1.000                      | 0 (0)            | 8 (13.6)         | <b>0.001</b>               |
| Antihistamines             | 205 | 58 (56.9)        | 74 (72.5)        | <b>0.028</b>                | 21 (67.7)        | 39 (90.7)        | <b>0.017</b>               | 37 (52.1)        | 35 (59.3)        | 0.480                      |
| Azithromycin               | 205 | 5 (4.9)          | 15 (14.7)        | <b>0.032</b>                | 2 (6.5)          | 7 (16.3)         | 0.288                      | 3 (4.2)          | 5 (13.6)         | 0.066                      |
| Biological therapies       | 205 | 14 (13.7)        | 16 (15.7)        | 0.844                       | 8 (25.8)         | 9 (20.9)         | 0.780                      | 6 (8.5)          | 7 (11.9)         | 0.567                      |
| Immunotherapy              | 204 | 21 (20.6)        | 17 (16.8)        | 0.590                       | 16 (51.6)        | 16 (37.2)        | 0.243                      | 5 (7.0)          | 1 (1.7)          | 0.222                      |
| Antibiotics                | 205 | 18 (17.8)        | 45 (44.1)        | <b>6.8x10<sup>-5</sup></b>  | 2 (6.5)          | 15 (34.9)        | <b>0.005</b>               | 16 (22.9)        | 30 (50.8)        | <b>0.002</b>               |
| Medication adherence       | 203 | 25.0 (23.0-25.0) | 25.0 (23.0-25.0) | 0.121                       | 24.0 (19.0-25.0) | 23.5 (20.0-25.0) | 0.570                      | 25.0 (25.0-25.0) | 25.0 (23.0-25.0) | 0.444                      |
| Home environment (rural)   | 204 | 52 (51.0)        | 60 (58.8)        | 0.325                       | 18 (58.1)        | 25 (59.5)        | 1.000                      | 37 (52.1)        | 25 (41.7)        | 0.292                      |
| Household pets             | 201 | 48 (48.5)        | 49 (48.0)        | 1.000                       | 15 (51.7)        | 20 (47.6)        | 0.811                      | 33 (47.1)        | 29 (48.3)        | 1.000                      |
| Education level            | 204 |                  |                  |                             |                  |                  |                            |                  |                  |                            |
| No schooling completed     |     | 2 (2.0)          | 1 (1.0)          | 1.000                       | 0 (0)            | 1 (2.4)          | 1.000                      | 2 (2.8)          | 0 (0)            | 0.500                      |
| Lower secondary education  |     | 40 (39.2)        | 39 (38.2)        | 1.000                       | 4 (12.9)         | 11 (26.2)        | 0.243                      | 36 (50.7)        | 28 (46.7)        | 0.726                      |
| Higher secondary education |     | 37 (36.3)        | 41 (40.2)        | 0.666                       | 15 (48.4)        | 19 (45.2)        | 0.816                      | 22 (31.0)        | 22 (36.7)        | 0.578                      |
| Higher education           |     | 23 (22.5)        | 21 (20.6)        | 0.865                       | 12 (38.7)        | 11 (26.2)        | 0.312                      | 11 (15.5)        | 10 (16.7)        | 1.000                      |

---

Descriptives are represented by the mean (standard deviation) and the median (interquartile range) values for continuous variables with a normal and non-normal distribution, respectively, and the count (proportion) for categorical variables. Differences between groups were evaluated using t-test and Mann-Whitney U-test for continuous variables with normal and non-normal distribution, respectively, and Fisher's exact test for categorical variables. Statistically significant differences are indicated in boldface ( $p < 0.05$ ).

**Abbreviations:** FEV<sub>1</sub>: Forced expiratory volume in the first second; FVC: Forced vital capacity; BDR: Bronchodilator response; IgE: Immunoglobulin E; OCS: Oral corticosteroids; ER: Emergency room; SABA: Short-acting beta agonists; ICS: Inhaled corticosteroids; LABA: Long-acting beta agonists; LTRA: Leukotriene receptor antagonists; SAMA: Short-acting muscarinic antagonists; LAMA: Long-acting muscarinic antagonists; NA: Not applicable.
